## **Dynamics of nevus development implicate cell cooperation in the growth arrest of transformed melanocytes**

Rolando Ruiz-Vega<sup>1,2</sup>, Chi-Fen Chen<sup>3</sup>, Emaad Razzak<sup>1</sup>, Priya Vasudeva<sup>3</sup>, Tatiana B. Krasieva<sup>4</sup>, Jessica Shiu<sup>3</sup>, Michael G. Caldwell<sup>1</sup>, Huaming Yan<sup>5</sup>, John Lowengrub<sup>1,5</sup>, Anand Ganesan<sup>1,3,6</sup>, Arthur D. Lander<sup>\*1,2</sup>

1. Center for Complex Biological Systems, University of California Irvine, Irvine CA, 92697, USA.

2. Department of Developmental and Cell Biology, University of California Irvine, Irvine CA, 92697, USA.

3. Department of Dermatology, University of California Irvine, Irvine CA, 92697, USA.

4. Beckman Laser Institute, University of California Irvine, Irvine CA, 92697, USA.

5. Department of Mathematics, University of California Irvine, Irvine CA, 92697, USA.

6. Department of Biological Chemistry, University of California Irvine, Irvine CA, 92697, USA.

\*Correspondence: [adlander@uci.edu](mailto:adlander@uci.edu)

### *Keywords:*

Nevi, melanocytes, Braf mutation, oncogene induced senescence, nevus mouse model, skin, nevus growth arrest, systems biology, clonal dynamics, pigment, live mouse imaging, SASP, senescence

*Short Title:* Cooperative dynamics in melanocyte growth arrest

## 1 **Abstract**

2 Mutational activation of the BRAF proto-oncogene in melanocytes reliably produces benign nevi  
3 (pigmented “moles”), yet the same change is the most common driver mutation in melanoma. The  
4 reason nevi stop growing, and do not progress to melanoma, is widely attributed to a cell-  
5 autonomous process of “oncogene-induced senescence”. Using a mouse model of Braf-driven  
6 nevus formation, analyzing both proliferative dynamics and single-cell gene expression, we found  
7 no evidence that nevus cells are senescent, either compared with other skin cells, or other  
8 melanocytes. We also found that nevus size distributions could not be fit by any simple cell-  
9 autonomous model of growth arrest, yet were easily fit by models based on collective cell  
10 behavior, e.g. in which arresting cells release an arrest-promoting factor. We suggest that nevus  
11 growth arrest is more likely related to the cell interactions that mediate size control in normal  
12 tissues, than to any cell-autonomous, “oncogene-induced” program of senescence.  
13

## 14 **INTRODUCTION**

15 Activating BRAF mutations (e.g. BRAF<sup>V600E</sup>) are the most common oncogenic mutations in  
16 melanoma, seen in about 66% of cases (Davies et al., 2002). Curiously, the same mutation is  
17 found in 89% of melanocytic nevi (Pollock et al., 2003)—the benign, pigmented “moles” found on  
18 the skin of most individuals. In animal studies, melanocyte-specific expression of BRAF<sup>V600E</sup>  
19 efficiently produces nevi, but only very rarely melanoma (Dankort et al., 2009; Dhomen et al.,  
20 2009; Patton et al., 2005). The widely-accepted explanation is that transformed melanocytes  
21 undergo oncogene-induced senescence (OIS), arresting proliferation before additional oncogenic  
22 events can occur (e.g. Bennett, 2003; Huang et al., 2017; Kaplon et al., 2014; Michaloglou et al.,  
23 2005).

24 Nevus melanocytes are indeed growth-arrested, but the assumption that OIS is the cause  
25 remains untested, in part because of a lack of criteria to rigorously define OIS in vivo (Damsky &  
26 Bosenberg, 2017). Initially studied as a consequence of forced expression of oncogenes in cell  
27 cultures (Serrano et al., 1997), OIS has come to be seen as a distinctive cellular stress response  
28 characterized by a phenotype of growth arrest, morphological and metabolic changes, chromatin  
29 alterations, and secretion of growth factors, chemokines, cytokines and proteases (Campisi &  
30 d'Adda di Fagagna, 2007; Gorgoulis et al., 2019; Ito et al., 2017; Kuilman et al., 2010).

31 Given an abundance of “hallmarks” of senescence, one might think that recognizing this cell  
32 state in vivo should be straightforward. Yet no single hallmark distinguishes senescence from  
33 other growth-arrested cell states. Phenotypes once thought to be “gold standards”, such as

34 expression of lysosomal beta-galactosidase, cyclin-dependent kinase inhibitors, or p53,  
35 commonly mark only subsets of senescent cells (Wiley et al., 2017), as well as non-senescent  
36 cells (Tran et al., 2012). Moreover, observations of supposedly senescent cells resuming  
37 proliferation (e.g. Beausejour et al., 2003), imply that permanent cell cycle exit cannot be used as  
38 a distinguishing feature. In vivo senescence, as a result, is currently somewhat of a *Gestalt*  
39 diagnosis, i.e. assessed by a collection of traits, no subset of which is necessary or sufficient. Yet  
40 there is no clear consensus on which traits are best to assess, and recent meta-analyses of gene  
41 expression suggest that some of the most commonly assessed features are not “core” to  
42 senescence at all (Hernandez-Segura et al., 2017).

43 The reason it is important to clarify how BRAF-transformed nevus melanocytes stop growing  
44 is that it shapes how we think about the origins of melanoma. OIS is usually portrayed in *cell-*  
45 *intrinsic* terms: oncogene expression within a transformed cell produces a stress within *that* cell,  
46 which triggers *it* to senesce. Even those who acknowledge a possible role for paracrine signals  
47 (Acosta et al., 2013; Elzi et al., 2012; Ito et al., 2017; Wajapeyee et al., 2008) still portray the  
48 process as something initiated and orchestrated by cell-autonomous responses to oncogenes.  
49 This naturally leads to an approach to melanoma prevention and treatment that focuses on  
50 understanding how oncogenes derange intracellular processes; how those derangements elicit  
51 stress responses; and what might enable cancer cells to circumvent those responses (e.g.  
52 Bennett, 2003; Damsky & Bosenberg, 2017; Vredeveld et al., 2012; Yu et al., 2018). In contrast,  
53 as we argue below, it is possible that the growth arrest displayed by nevus melanocytes has little  
54 to do with oncogene-induced stress, and may have more to do with networks of cell-cell  
55 communication that are characteristic of melanocytes, independent of whether they are  
56 transformed. In this case, the most effective path to understanding how to prevent or treat  
57 melanoma could be to better elucidate the normal physiology of melanocytes in their environment.

58 Here, we investigate the details of nevus growth arrest in a model in which melanocyte-  
59 specific *Braf* activation generates hundreds of nevi on the skin of mice (Dankort et al., 2009). By  
60 examining both single-cell transcriptomes and the dynamics of growth arrest in nevus-associated  
61 melanocytes, we make two key observations: First, patterns of gene expression in arrested nevus  
62 melanocytes fail to identify them as any more senescent than other skin cells or normal  
63 melanocytes, arguing against a primary role for any form of senescence in their arrest. Second,  
64 the timing and statistics of nevus formation effectively argue against *any* relatively simple cell-  
65 autonomous process as being the cause of growth arrest. Ultimately, we propose a model in  
66 which arrest is driven not by oncogene stress, but by feedback mechanisms similar to those

67 commonly involved in normal tissue homeostasis.

## 68 **RESULTS**

### 69 **Dynamics of nevus growth**

70 Characterizing the dynamics of nevus growth and arrest requires observing nevi that started  
71 growing at known times. We took advantage of a mouse model in which Cre-mediated  
72 recombination introduces the activating V600E mutation into the endogenous *Braf* locus. When  
73 crossed onto a background carrying a *Tyr::CreER* transgene, the mice acquire the *Braf*<sup>V600E</sup>  
74 mutation only in cells of the melanocytic lineage, and only after Cre activation by 4-  
75 hydroxytamoxifen (4-OHT), applied either systemically or through painting on the skin.

76 As shown previously (Dankort et al., 2009), 4-OHT treatment of these mice leads to  
77 development of numerous pigmented nevi. Visualization of nevi is hindered, however, by the  
78 strong pigmentation in hair follicles which, except at microscopic resolution, can be difficult to  
79 distinguish from nevi. One way to circumvent this difficulty is to observe nevi only during the  
80 telogen phase of the hair cycle, when follicle-associated pigment is not present (conveniently,  
81 synchronization of hair cycles may be maintained on a large patch of skin through depilation).

82 As shown in Figure 1, in mice whose back skin was treated with topical 4-OHT at postnatal  
83 day 2 (P2), P3 and P4, nevi were apparent macroscopically at telogen (P50; Fig. 1A). Live-  
84 imaging, using multi-photon microscopy (MPM; (Saager et al., 2015)), revealed that, like human  
85 nevi, mouse nevi consist of scattered nests of pigment-containing cells (Fig. 1B). Nevi could also  
86 be visualized post-mortem, using a dissecting microscope, on the undersurface of pieces of  
87 telogen-stage back skin (Fig. 1C).

88 An alternate approach to visualization that did not require hair synchronization was to  
89 generate nevi by painting 4-OHT on glabrous (hairless) skin, such as the ventral surface of the  
90 paw, permitting tracking of individual nevi on a daily basis. As shown in Fig. 1D, when forepaws  
91 were treated with 4-OHT from P2 through P4, tiny nevi could be detected as early as P6. Serial  
92 observation indicated that most nevi reach a maximum size somewhere between P16 and P21  
93 (Fig. 1D and S1A). This suggests that, in the mouse, *Braf*<sup>V600E</sup>-transformed melanocytes arrest  
94 within 2-3 weeks. To confirm this, we used BrdU labeling to monitor DNA synthesis. Because  
95 melanin readily obscures immunohistochemical signals, these experiments were done in an  
96 albino (unpigmented) genetic background, using premelanosome protein (Pmel) staining to

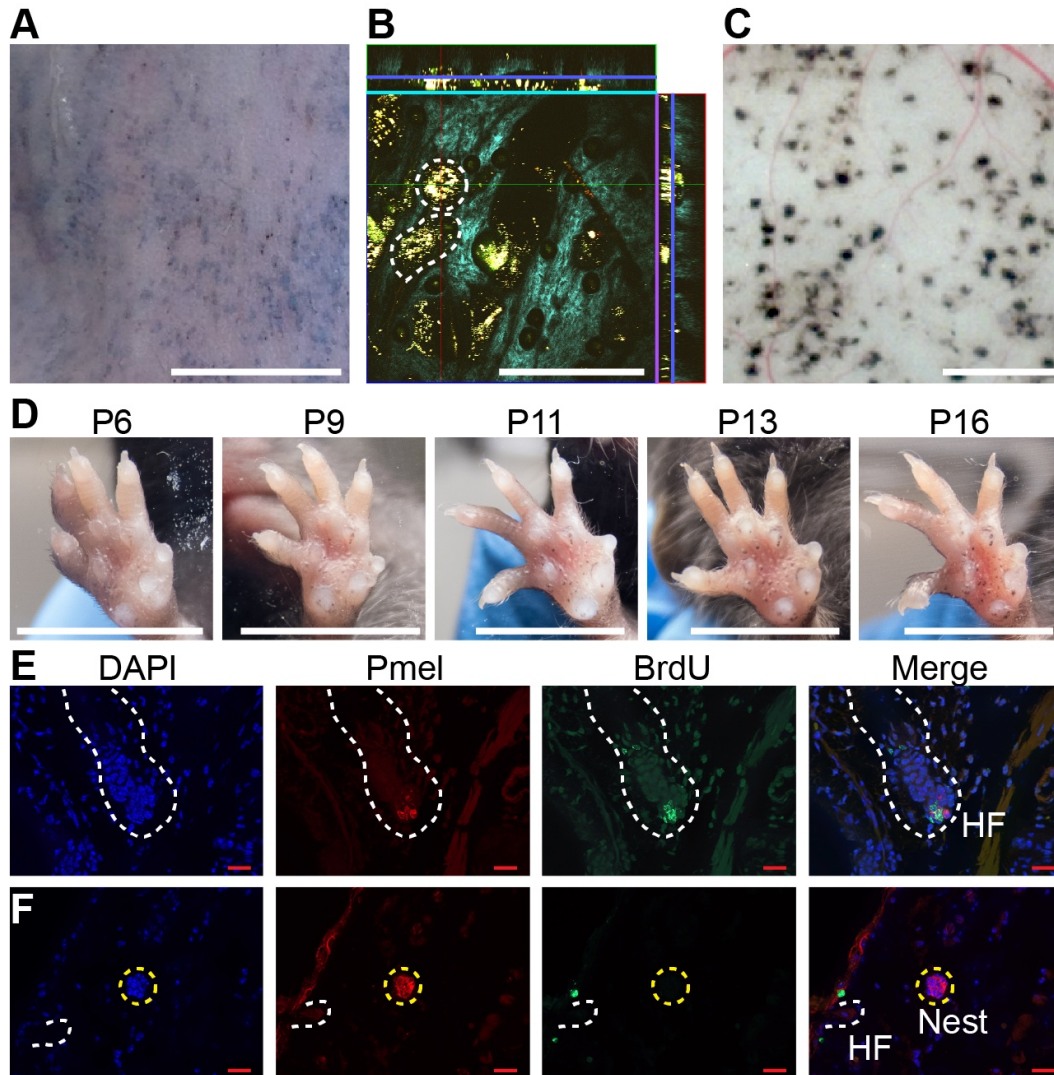

97

**Figure 1. Dynamics of nevus growth.** A-D. Visualization of nevi on Braf<sup>V600E</sup> mice. (A) Live imaging of back skin at telogen stage (P50), following hair depilation. Scale bar = 5 mm. (B) Live imaging of a sample like that in panel A using multiphoton microscopy. The central square is an *en face* view of the skin (x-y plane), while rectangles above and to the right are cross-sections (x-z and y-z planes, respectively, with blue lines marking the location of the central image). Melanin autofluorescence appears yellow, second harmonic generation of collagen is cyan, and keratin autofluorescence is green. Dashing outlines dermal melanocyte nests. Scale bar = 318  $\mu$ m. (C) Appearance of nevi on the undersurface of back skin (at P21). Scale bar = 1 mm. (D) Nevus development on the ventral (glabrous) surface of the paw. Images of a single paw were taken at the indicated ages. Scale bar = 0.5 cm. E. Assessment of melanocyte proliferation. Sections are from albino wildtype (E) and Braf<sup>V600E</sup> (F) skin at P21. Melanocytes were identified by premelanosome protein (Pmel) immunohistochemistry and proliferation assessed by BrdU incorporation. Wildtype hair follicle (HF) melanocytes (E) incorporate BrdU whereas nevus melanocytes (F) do not. Scale bar = 20 $\mu$ m.



98 identify melanocytes. As shown in Fig. 1F, albino mice generate nests similar to those seen in  
99 pigmented mice. In such animals, BrdU readily incorporated into hair follicle melanocytes (Fig.  
100 1E, S1B), whereas by p21 nests within nevi were uniformly negative for BrdU, implying growth  
101 arrest (Fig. 1F, S1C).

102 The conclusion that Braf-induced nevi are already growth-arrested by P21 agrees with the  
103 reports of others (Damsky & Bosenberg, 2017), and is lent further support by time course  
104 measurements of nest size by MPM (Fig. 1C), which show that nest size distributions change  
105 insignificantly between P21 and P50 (Fig. S4A-B).

106

### 107 **Do nevi undergo “oncogene-induced senescence”?**

108 As discussed above, senescence is usually accompanied by distinctive gene expression.  
109 Various gene expression “signatures” have been developed to help investigators identify  
110 senescent cells and distinguish them from cells that have become growth arrested by other  
111 processes. We considered several of these (Data S1):

112 1) A set of genes encoding the most commonly considered “hallmarks” of senescence, i.e.  
113 p53, Rb, lysosomal beta-galactosidase, H2AX, and three cyclin-dependent-kinase inhibitors  
114 (“Classical”, 7 genes (Campisi & d’Adda di Fagagna, 2007; Collado & Serrano, 2006));

115 2) A gene signature that distinguishes cultured human fibroblasts growth arrested by BRAF-  
116 transformation from quiescent fibroblasts (“Kuilman”, 21 genes (Kuilman et al., 2008))

117 3) Results of a meta-analysis (Hernandez-Segura et al., 2017)) of publications on fibroblasts,  
118 melanocytes, and astrocytes, comparing senescence (induced by multiple different stresses) with  
119 quiescence, yielding “universal” signatures of genes that are up- and down-regulated specifically  
120 in senescence (“Universal Up”, 31 genes, and “Universal Down”, 23 genes) as well as signatures  
121 of genes specifically up- or down-regulated by senescence induced in melanocytes (“Melanocyte  
122 Up”, 397 genes and “Melanocyte Down”, 135 genes).

123 4); The most statistically significant genes in a recent meta-analysis (Chatsirisupachai et al.,  
124 2019) of 20 replicative senescence microarray datasets from the Gene Expression Omnibus  
125 (“Chatsirisupachai Up”, 237 genes and “Chatsirisupachai Down”, 244 genes).

126 5) A list of genes characteristic of the “Senescence-Associated Secretory Phenotype”  
127 (“SASP”, 81 genes), compiled from 38 literature references (for citations see Data S1).

128 To determine whether any of these proposed signatures fits nevus melanocytes, we  
129 performed single cell RNA-sequencing on dissociated cells from the back skin of nevus-bearing

130 mice at both P30 and P50 (i.e. after nevi have stopped growing), using wildtype skin as a control.  
 131 Using known cell-type marker genes (Fig. S2A-B), we identified 14 different cell types in the skin,  
 132 including melanocytes (Fig. 2A). Unsupervised clustering further sub-divided the melanocytes  
 133 into four groups (Fig. 2B): Two of them, Mel 0 and Mel 1, were composed of cells found only in  
 134 nevus-bearing, and not wild-type, skin (Fig. 2C); they are highly similar in gene expression,

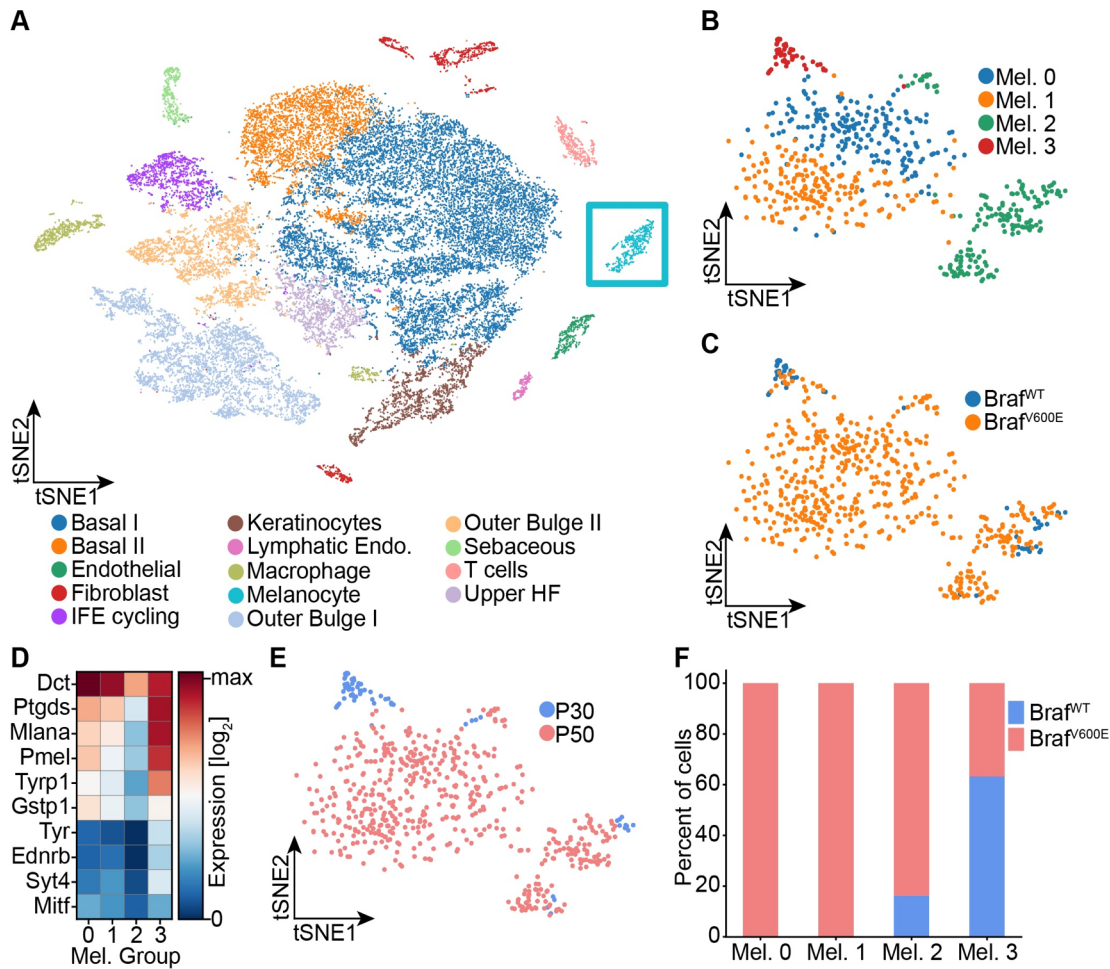

**Figure 2.** Single cell RNA sequencing of mouse dorsal skin to transcriptionally characterize melanocytes. **A.** Skin cell types are visualized with tSNE (cells = 35,141) from mice at P30 (n[Braf<sup>WT</sup>] = 2 mice, n[Braf<sup>V600E</sup>] = 2 mice) and P50 (n[Braf<sup>WT</sup>] = 3 mice, n[Braf<sup>V600E</sup>] = 3 mice). Melanocytes are outlined with a blue box. **B.** Subclustering of melanocytes (n = 609) and visualized on a tSNE plot. Four clusters were identified. **C.** Visualization of melanocytes based on their genotype on a tSNE plot. **D.** A heat map of different genes involved in pigmentation. Each cluster expresses these genes at different levels. **E.** Visualization of melanocytes based on their age on a tSNE plot. **F.** Quantification of melanocytes in each cluster based on their genotype BRAF wild-type or mutant mice.

135 primarily differing in having a slightly lower level of pigment gene expression in Mel 1 versus Mel  
136 0 (Fig. 2D). We identify them as the “nevus melanocytes”, because they are seen only when nevi  
137 are present, and are by far the predominant melanocyte population in such animals.

138 Mel 2 cells express the lowest levels of pigmentation genes (Fig. 2D), and are seen in both  
139 genotypes (Fig. 2C) at all stages (although expanded in number in nevus-bearing animals (Fig.  
140 2F)). Their pattern of gene expression bears a strong resemblance to one recently published for  
141 melanocyte stem cells isolated from telogen-stage hair follicles (Zhang et al., 2020). In particular,  
142 they express *Cd34*, which has been proposed to be a marker for bulge-associated melanocyte  
143 stem cells (Joshi et al., 2019).

144 Finally, cells of cluster Mel 3, which express the highest levels of pigment genes (Fig. 2D),  
145 are found in both mutant and wildtype mice, but only at the P30 time point (Fig. 2E-F). We thus  
146 identify them as mature hair follicle melanocytes, as such cells are present exclusively during  
147 anagen phase of the hair cycle (P30), and disappear during telogen (P50).

148 Because gene signatures are based on the idea of up- and down-regulation of expression  
149 relative to some baseline state, to test whether nevus melanocytes fit a known signature it is  
150 necessary to have comparison transcriptomes. We made two types of comparisons: nevus  
151 melanocytes versus every other cell type in the skin (which, with the possible exception of mature  
152 keratinocytes, we would not expect to be senescent); and the four melanocyte sub-clusters (two  
153 of which are nevus-associated and two of which are not) versus each other. In each case we  
154 computed average expression for each gene in every cell type or cluster, together with a standard  
155 error of the mean as a measure of dispersion. Expression values were then normalized to  
156 average expression across all of the cells being compared (i.e. all skin cells, or all melanocytes,  
157 depending on which comparison was being done) and  $\log_2$ -transformed, so that positive values  
158 signify upregulation (relative to the average for that gene), and negative downregulation. Gene  
159 expression was then visualized using heat maps (Fig. 3A, S3, with positive values in blue and  
160 negative in red). Because gene expression levels inferred from single cell RNA sequencing tend  
161 to be noisy, particularly for genes with low expression, we ranked all genes by their minimum level  
162 of noise (i.e. normalized standard error of the mean in the least noisy cell type), and used this  
163 value (“n-SEM”, which is also presented graphically as a bar to the right of each heatmap) to sort  
164 gene lists, so that maps vary from most to least reliable as one goes from top to bottom.

165 Figure 3A shows the results for the “Classical” and “Universal Up” signatures (heat maps for  
166 the other signatures are shown in Figure S3). Here we see no strong enrichment of blue over red  
167 signals in nevus melanocytes, nor in most other cells. When compared with whole skin, using



168 the “Classical” signature, only *Cdkn2a* stands out as strongly upregulated in nevus melanocytes,  
 169 but it is similarly upregulated in skin fibroblasts (it also has the noisiest data among genes in the  
 170 signature). With the “Universal Up” signature, more genes are downregulated than upregulated  
 171 in nevus melanocytes. To quantify such impressions, we summed the  $\log_2$ -transformed data in  
 172 each column in every heat map, producing the bar graphs in Figure 3B. We reasoned that  
 173 summation of log-transformed data would emphasize consistent trends in the data while

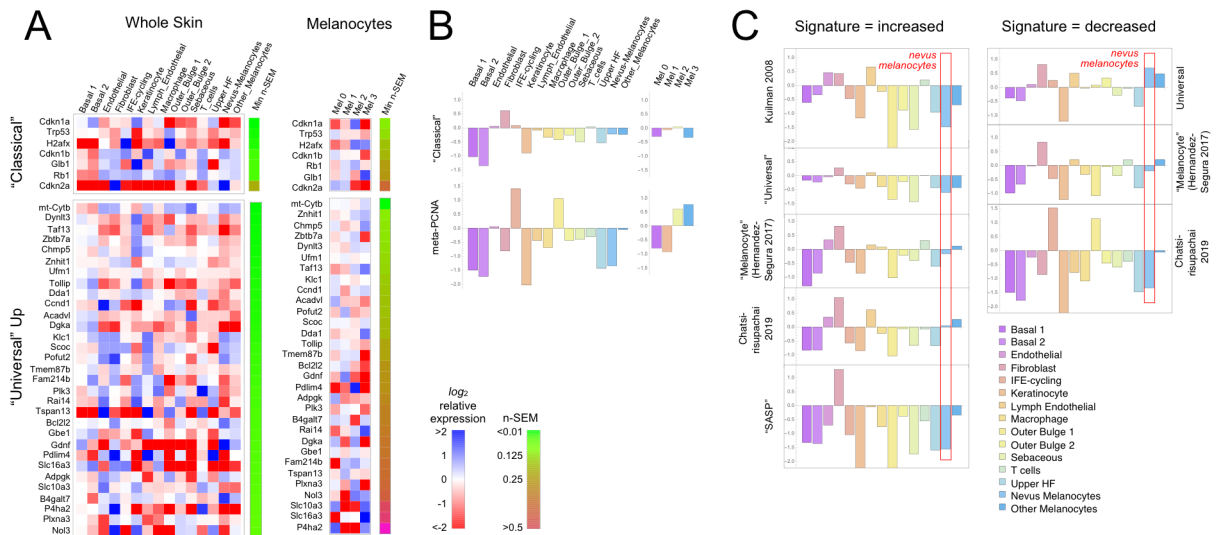

**Figure 3. Gene expression fails to identify nevus melanocytes as senescent.** Transcriptomes of clusters identified in Fig. 2 were compared with proposed “signatures” of senescence. **A.** Gene expression data for clusters in Fig. 2A and 2B were averaged by cluster and, for each gene, expressed as a ratio to the average expression level of that gene in the entire skin sample (“Whole Skin”) or just the melanocyte clusters (“Melanocytes”). The heat map displays the logarithm of that ratio, with blue representing upregulation and red downregulation, relative to the appropriate average. Two proposed signatures for genes upregulated in senescence (“Classical” and “Universal Up”) are shown (For other signatures, see Fig. S4). Gene lists have been sorted by the minimum gene expression variability within the least variable cluster (green-brown bar). **B.** The “Classical” heatmaps in panel A are summarized as a bar graph displaying the sum of the log-transformed data. Also shown are summary results for a proposed signature of proliferation, “meta-PCNA”, which clearly distinguishes between cell types expected to be proliferative and non-proliferative (in normal skin). The “Classical” senescence signature fails to identify nevus melanocytes (Mel 0 and Mel 1) as senescent, especially when compared with other cell types or other melanocytes. **C.** Extension of the analysis in panel B to eight additional signatures.

174 suppressing effects of noise (random positive and negative variation would tend to cancel out).  
175 The results suggest that skin fibroblasts better fit the “Classical” senescent signature than any  
176 skin cell type, including nevus melanocytes, or indeed melanocytes of any cluster. As a control—  
177 to demonstrate the ability of this approach to correctly associate cell types with gene signatures—  
178 we analyzed the same data using a signature of cell proliferation, “meta-PCNA”, that represents  
179 129 human genes most positively correlated with proliferation marker PCNA in a compendium of  
180 normal tissues (Venet et al., 2011). As shown in Fig. 3B (also see Fig. S3), this signature (122  
181 genes of which had unambiguous mouse orthologs; Data S1) identified two keratinocyte  
182 populations (“IFE-cycling” and “Outer Bulge 1”) as highly proliferative (in agreement with (Joost  
183 et al., 2020)), and mature (postmitotic) keratinocytes as non-proliferative. Importantly, it also  
184 correctly identified nevus melanocytes as non-proliferative—and other melanocytes as  
185 proliferative—in agreement with Fig. 1E-F.

186 Figures 3C and S3 extend this analysis to the remaining eight potential signatures of  
187 senescence (five consisting of genes that are upregulated; three of genes that are  
188 downregulated). In five of the eight cases, nevus melanocytes rank as *less* senescent than the  
189 average skin cell; in two of the cases nevus melanocytes are about average. In only one case  
190 (“Chatsirisupachai Down”) does nevus melanocyte gene expression go in the predicted direction  
191 for senescence. However, the Chatsirisupachai signatures had not been curated to remove  
192 genes associated simply with proliferation/quiescence (Chatsirisupachai et al., 2019), and  
193 inspection of the “Chatsirisupachai Down” gene list shows that 61 of its 250 genes are shared  
194 with the 129-gene meta-PCNA signature; i.e., it is more likely a signature of proliferation than  
195 “non-senescence” (note the strong similarity between the “Chatsirisupachai Down” bar graph in  
196 Fig. 3C and the meta-PCNA graph in Fig. 3B).

197 Together these data do not support the view that any sort of senescence—oncogene-induced  
198 or otherwise—is characteristic of nevus melanocytes and therefore a possible cause of their  
199 growth arrest.

## 200 **Does a cell autonomous process arrest nevi?**

201 As discussed above, OIS is usually presented as a cell-autonomous process [e.g. (Dankort et  
202 al., 2009; Dhomen et al., 2009; Michaloglou et al., 2005; Serrano et al., 1997)]. The simplest cell-  
203 autonomous process that one might imagine is a probabilistic switch: Once oncogene activation  
204 commences, cells arrest with a fixed probability (per time or per cell cycle). Regardless of the  
205 molecular details, such a model makes distinctive predictions about clonal dynamics.

206 Consider the clonal descendants of a single oncogene-transformed founder cell. For any

207 value of the per-cell-cycle senescence probability (which we denote here as “s”), how many cells  
208 should we expect that clone to contain at any given time? How many cell cycles should it take  
209 before all of the cells in most clones should have arrested? Such questions are well studied in  
210 mathematics (Athreya & Ney, 1972), and easily solved by computer simulation. For this particular  
211 problem, there are two key results (Figure 4).

212 First, the time after which one can expect clones to have stopped growing (e.g. when all cells  
213 will have arrested in, say, 95% or 99% of clones) is a steep function of s. If  $s < 0.5$ , (i.e. less than  
214 a 50% chance of arrest per cell cycle), then some clones will never stop growing. If s is, say,  
215 0.53, all clones will eventually stop growing, but one must wait 51 cell cycles before 99% of them  
216 do so (Fig. 4A). Given typical lengths of postnatal mammalian cell cycles, and the fact that we  
217 observe cessation of mouse nevus growth in about 2-3 weeks, we may consider 30 to be a  
218 generous estimate for the maximum number of cell cycles by which nevi stop growing. To achieve  
219 99% clonal arrest by 30 cell cycles, s must be around 0.56 or higher; to achieve arrest in 95% of  
220 clones, s must be greater than 0.52 (Fig. 4A).

221 From the same simulations one may also calculate predicted distributions of clone sizes.  
222 There is a clear reciprocal relationship between mean clone size and the fraction of clones that  
223 arrest by 30 cell cycles of time (Fig. 4B). For example, a value of s that enables 95% of clones  
224 to arrest produces a mean clone size of only 18.5 cells. For comparison, we estimate cell  
225 numbers per nevus to be in the range of 100-1000 cells (see Methods).

226 The explanation for the small mean clone sizes produced by simulations can be appreciated  
227 by examining the full size distributions. As shown in Fig 4C-D, such distributions are extremely  
228 heavy-tailed, with a very large number of very small clones and a small number of very large  
229 clones (the histograms in Fig. 4C-D are plotted with logarithmic abscissa to facilitate display of all  
230 clone sizes).

231 Qualitatively, this is very different from what we observed for nevi on the backs of p21 mice.  
232 Nevi displayed a mean radius of 76.8  $\mu\text{m}$  (corresponding to an area of 0.019  $\text{mm}^2$ , in excellent  
233 agreement with the results of (Damsky et al., 2015)) and, when plotted on a logarithmic scale,  
234 individual radii displayed a Gaussian-like distribution (Fig. 4E; a Gaussian shape on a logarithmic  
235 axis is usually referred to as “log-normal”). Interestingly, nest sizes (quantified by MPM) also  
236 seem to be log-normally distributed whether at P21 (Fig. S4A) or P50 (Fig. S4B). So are the nests  
237 within human melanocytic nevi, despite the latter being an order of magnitude larger than those  
238 in mice (Fig. S4C). It should be noted that using different units to represent simulation results  
239 (cell numbers) and empirical data (linear dimension) in Fig. 4 and S4 does not confound

240 comparing the shapes of distributions, thanks to the logarithmic abscissa: as long as cell number  
 241 scales as some power of linear dimension, values associated with log-transformed bins are simply

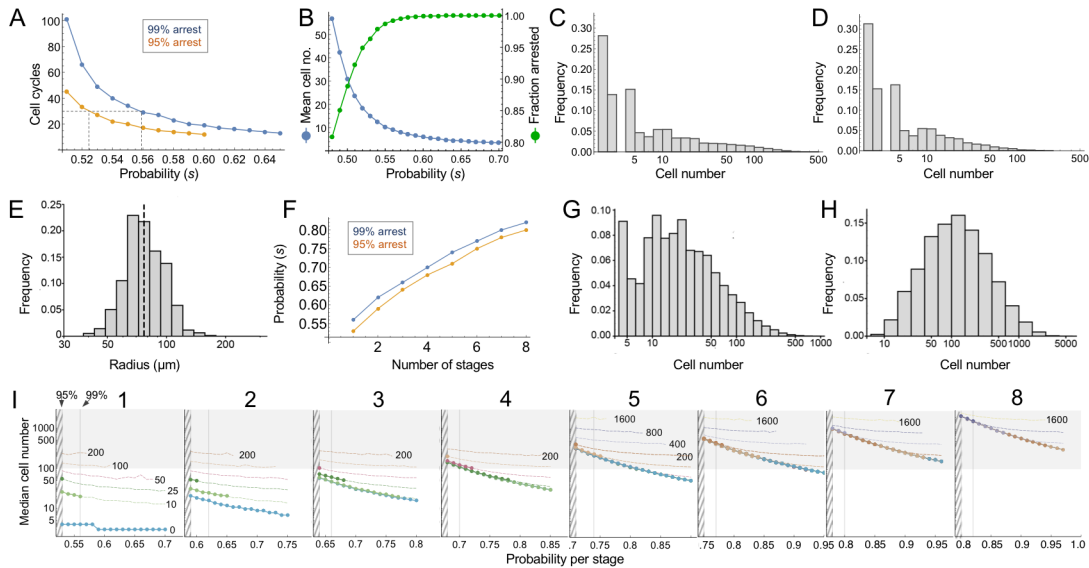

**Figure 4. Modeling cell-autonomous clonal arrest as a probabilistic process. A-D.** Monte Carlo simulations were carried out in which a single cell replicates and arrests with fixed probability,  $s$ , per cell cycle. **A.** Cell cycles required before proliferation stops in 95% or 99% of simulations. **B.** Mean cells at 30 cell cycles, and the fraction of clones that can be expected to have arrested by then. **C-D.** Clone (nevus) size distributions, after 30 cell cycles, assuming  $s = 0.56$  (C) or  $0.53$  (D). **E.** Actual mouse nevus sizes at P21 (mice = 3, nevi = 768). Dashed line shows median radius,  $76.8\mu\text{m}$ . **F-I.** Simulations in which proliferating cells arrest after multiple events (stages). **F.** The value of  $s$  required to ensure arrest within 30 cell cycles, as a function of number of stages. **G-H.** Clone size distributions for two (G), or three (H) stages, assuming the lowest per-stage transition probability compatible with 99% arrest by 30 cell cycles (see panel C). **I.** Median clone size for different numbers of stages (labeled above each graph), transition probabilities per stage (plotted on the abscissa), and thresholds below which clones are excluded from analysis. Each curve represents a different exclusion threshold (between 0 and 200 cells for 1-4 stages, and up to 1600 cells for 5-8 stages, as labeled). Curves become dashed at the point where the observability threshold exceeds 50% of the median cell number (values along the dashed segments require most observed nevi to be only barely larger than the limits of observation, which qualitatively disagrees with observations). Within the hatched region, fewer than 95% of clones arrest by 30 cell cycles. The thin line to right of the hatched region marks the probability at which 99% of clones arrest by 30 cell cycles. Solid gray demarcates median cell numbers between 100 and 3000 (see text). All results are from a minimum of 20,000 simulations.

242 scaled by a constant factor.

243 The above comparison of observed distributions with the results of computer simulation is not  
244 entirely fair, however: Simulations track all clones, no matter how small, whereas empirical  
245 distributions undoubtedly omit nevi with sizes below some threshold of observability. To correct  
246 for this, one can truncate simulated distributions to remove clones smaller than some threshold  
247 size. With no *a priori* way to know what threshold to use, we examined the entire range of  
248 plausible truncations (up to the largest clone sizes). As it turns out, the relative shapes of  
249 simulated distributions were about the same regardless of where they were truncated. The  
250 reason for this behavior can be understood by displaying simulated distributions (with bin sizes of  
251 one cell) on a log-log plot, and observing that they fall, over most clone size ranges, on a straight  
252 line (see Supplemental Material). This implies an approximately “power law” relationship which,  
253 by definition, is scale-free, i.e. has the same relative shape over any range of observations. In  
254 fact, for  $s$  reasonably close to 0.5, the approximate probability of observing any clone size can be  
255 shown analytically to vary inversely with the  $3/2$ -power of size (for derivation, see Supplemental  
256 Material).

257 These data imply that observed nevus size distributions cannot be generated by any cell-  
258 autonomous, random, time independent, one-step process. But they do not speak to whether a  
259 more complicated random process, for example, one with several steps, might suffice. To  
260 address this, one can simulate clonal evolution under multi-step models. Again, dynamic  
261 predictions can be made. First, to achieve clonal stopping times within 30 cell cycles, the  
262 minimum per-step transition probability increases with the number of steps (Fig. 4F). For example,  
263 if it takes three random events to arrest growth in 99% of clones, the average probability of each  
264 event needs to be at least 0.66 per cell cycle; with five random events that number is 0.74.

265 Second, although distributions generated by such models still tend to be heavy-tailed (Fig.  
266 4G), they become less so as the number of steps increases (Fig. 4H), gradually approaching  
267 something that looks log-normal. This makes mathematical sense: as per-cell-cycle probabilities  
268 approach unity, the system approaches a clock that simply ticks off a fixed number of cell cycles  
269 before stopping. A scenario in which all clones stop at roughly the same time, plus or minus some  
270 variation, necessarily produces a log-normal distribution, since the logarithm of cell size will be  
271 proportional to the number of cell divisions.

272 To determine how many independent steps would be required for a random cell-autonomous  
273 process to produce distributions that fit those we observed for nevi, we simulated up to eight  
274 random stages, over a variety of transition probabilities (Fig. 4I). We subjected the results to a



275 range of possible truncations, from 0 to 1600 cells, to mimic any observability cutoffs in the  
276 empirical data, and recorded the median clone sizes produced under each of these scenarios.

277 As described below (see Methods), we estimate that the average nevus has about 500-1000  
278 cells, but given possible errors in the estimate, we consider here a range of values between 100  
279 and 3000 (gray-shaded area in Fig. 4I). Subject to the constraint that enough clones must arrest  
280 within 30 cell cycles, and that observation thresholds cannot be so high that the observed median  
281 is less than twice the threshold, we find that, to produce nevi of even 200 cells requires 4-5  
282 independent events (stages), depending on whether one requires 95% or 99% clonal arrest; to  
283 reach 500 cells requires 6-7 events. To reach even larger numbers—as would be found in human  
284 nevi, or in other mouse models (Chai et al., 2014)—would require even more stages.

### 285 **Does a collective process arrest nevi?**

286 The above results indicate that, to generate in vivo-like distributions of nevi, a process  
287 something like a clock is needed, with cells either counting elapsed divisions (or time) since  
288 oncogene activation, or progressing through a sufficiently large sequence of random processes,  
289 with tightly controlled probabilities, so that the net outcome is clock-like.

290 Cell-autonomous counting of cell cycles (up to about 12) can occur in early, cleavage-stage  
291 embryos (Tadros & Lipshitz, 2009), but no mechanism has been described to enable growing (as  
292 opposed to merely cleaving) cells to track more than a small handful of divisions (or the equivalent  
293 amount of time). Erosion of telomeres can mark the passage of large amounts of time in some  
294 cells, but this does not seem to occur to any significant degree in nevus melanocytes (Michaloglou  
295 et al., 2005)).

296 In contrast, if growth arrest is not cell-autonomous, but driven by cell-cell communication, then  
297 clock-like behavior is easily achieved, without any sort of intrinsic cell memory: Consider a simple  
298 communication circuit in which every cell's arrest probability is simply a monotonically increasing  
299 function of the number of cells around it that have already arrested (Fig. 5A). This mechanism  
300 describes a dynamically well-understood feedback process that normal tissues use to control size  
301 (Lander, 2011; Lander et al., 2009). Termed “renewal control” (Buzi et al., 2015), because  
302 differentiated cells control the probability that progenitor cells self-renew, the process is often  
303 mediated by secreted TGF- $\beta$  superfamily members such as myostatin, activin and GDF11  
304 (Gokoffski et al., 2011; Lee et al., 2005). Because it implements the engineering principle of

305 “integral negative feedback”, renewal control produces highly robust final population sizes that  
 306 are independent of parameters such as cell cycle speed or the starting numbers of cells (Buzi et

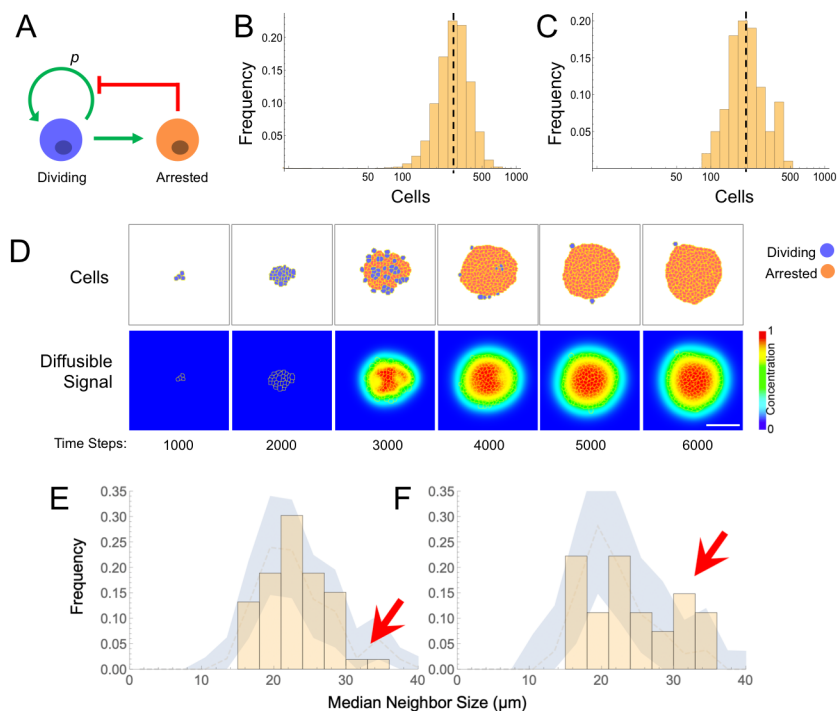

**Figure 5. Models and evidence for cooperative, feedback-mediated arrest.** **A.** A generic integral negative feedback scheme. “Renewal probability”,  $p$ , is the probability that offspring of cell division remain dividing (i.e.  $1-p$  is the probability that they arrest). **B.** Clone sizes generated by 9115 stochastic simulations of scheme A, modeled as an ordinary differential equation, where  $p$  falls with the number of arrested cells according to a Hill function with half-maximal effect at 50 arrested cells. **C-D.** Results from a spatial (agent-based) simulation of scheme A, in which the signal from arrested cells spreads by diffusion. Histogram (C) tabulates clone sizes produced by 100 independent simulations (the histograms in both B and C are logarithmically-scaled to show that the data are well fit by log-normal distributions). Panels (D) are from a single simulation, showing locations of growing and arresting cells, and the gradient of the diffusible signal. Bar = 50  $\mu\text{m}$ . The average cell cycle is equivalent to approximately 382 Monte Carlo time steps. **E-F.** Using spatial coordinates and areas of 122 nests in seven individual fields at P21, nests were modeled as disks of equivalent area, and mean sizes of neighboring nests falling within successively larger annuli around each target nest were determined. Distributions of mean neighbor sizes up to 45  $\mu\text{m}$  away from **(E)** large (radius  $>20\mu\text{m}$ ) and **(F)** small (radius  $<20\mu\text{m}$ ) nests (histograms) are compared with a “null distribution” derived by random permutation (blue fields). Arrows show deviations in neighbor size distribution greater than expected at random, and substantially different for large versus small nests.

307 al., 2015; Lander, 2011; Lander et al., 2009).

308 When growth arrest due to renewal control is simulated as a probabilistic process (Fig. 5B),  
309 the observed size distributions of clones is very close to log-normal. This is because renewal  
310 control effectively enforces cell cooperation, so that once a small fraction of a clone has arrested,  
311 the entire clone stops soon thereafter. The resulting narrow distribution of stopping times  
312 produces size distributions that are approximately log-normal, i.e. that emulate a clock.

313 This behavior is a generic outcome of feedback control, and does not depend strongly on the  
314 details of how feedback is implemented. Similar distributions are obtained whether we model  
315 nevi as progressing reversibly or irreversibly through more than one proliferative stage, or use  
316 agent-based simulations in which renewal is controlled by the concentration of a secreted  
317 molecule that accumulates according to the laws of diffusion and local uptake (Fig. 5C-D). The  
318 point of these simulations is not to argue in favor of a specific feedback mechanism, but rather to  
319 show that, where cell-autonomous mechanisms of arrest struggle to fit nevus dynamics, almost  
320 any sort of (collective) feedback does so easily.

321 Although nevus size distributions alone cannot shed light on the molecular details of how  
322 feedback might be implemented in nevi, it is interesting that those cells that we identify as nevus  
323 melanocytes (Fig. 2) express multiple genes encoding ligands with known or suspected growth  
324 inhibitory activities, together with the receptors for those ligands. These include TGF $\beta$  superfamily  
325 members *Gdf11*, *Gdf15*, *Tgfb1*, *Tgfb2*, and *Tgfb3*, as well as other genes associated with growth  
326 inhibition, such as *Angptl2*, *Angptl4*, *Il6*, *Sema3a*, *Sema3b*, and *Sema3f* (Attisano & Wrana, 1996;  
327 Neufeld et al., 2016; Santulli, 2014).

328 The evaluation of such candidates (as well as other genes expressed at too low a level to be  
329 reliably detected by single cell RNA sequencing) will no doubt require further study. In the  
330 meantime, we reasoned that any feedback mechanism based on secreted, diffusible factors  
331 should induce spatial correlations among clones. In particular, when clones (or subclones) get  
332 close enough to each other, they should inhibit each other's growth, leading to a smaller final size.  
333 The distance over which such effects could occur should reflect the spatial decay length of  
334 diffusible molecules in the skin, which is thought to be on the order of no more than a few hundred  
335 microns (Chen et al., 2015). Although our data on macroscopic nevi (Fig. 1D), which had been  
336 collected in a manner that included spatial coordinates, did not contain enough examples of nevus  
337 spacings in this range to test this hypothesis, our data on the nests within individual nevi did, as  
338 the median spacing between nests at postnatal day 21 was approximately 79 microns.

339 To assess whether nests were significantly smaller when located near other nests (especially  
340 large ones), we extracted the coordinates and nest areas from 7 separate fields at P21  
341 (representing 122 individual nests) and, modeling each nest as a disk of equivalent area,  
342 calculated the mean sizes of neighboring nests falling within successively larger annuli around  
343 each target nest. We compared the distributions of mean neighbor sizes near the 52 smallest  
344 nests (radius <20  $\mu\text{m}$ ) with the equivalent distributions around the 70 largest nests.

345 As shown in Figure 5E-F, within annuli extending 45  $\mu\text{m}$  away from the perimeters of target  
346 nests, we saw fewer examples of large neighbors (radius > 30  $\mu\text{m}$ ) around large nests (panel E)  
347 than around small ones (panel F). To determine whether the difference was statistically  
348 significant, we used a permutation test in which we randomly swapped nest areas (but not  
349 locations) within each field 5000 times, and recalculated the distributions. This allowed us to plot  
350 the envelope enclosing the 5<sup>th</sup> and 95<sup>th</sup> percentiles for permuted data, onto which we overlaid the  
351 observed data. Unlike the observed data, the envelopes of the permuted data (blue zones in Fig.  
352 5E-F) look similar whether target nests are large or small. Moreover, the observed data extended  
353 outside of the envelopes only for median neighbor sizes > 30  $\mu\text{m}$ , with the data for small target  
354 nevi extending well above the relevant envelope and the data for large target nevi lying at to the  
355 bottom of the envelope (Fig. 5E-F, arrows). These results argue that proximity is associated with  
356 a small, but significant decrease in nest size, supporting the view that nests inhibit each other's  
357 growth. Interestingly, when we repeated the same analysis using annulus sizes of 150  $\mu\text{m}$ ,  
358 differences in the sizes of neighbors of small and large nests were not seen, consistent with the  
359 view that whatever is promoting coordination among nests has a spatial range of <150  $\mu\text{m}$ .

## 360 **DISCUSSION**

361 Studies in man, mouse and fish establish that most melanocytic nevi form by mutational activation  
362 of BRAF, which triggers proliferation followed by growth arrest (Damsky & Bosenberg, 2017;  
363 Dankort et al., 2009; Dhomen et al., 2009; Kaufman et al., 2016; Michaloglou et al., 2005; Patton  
364 et al., 2005; Shain & Bastian, 2016). Nevus growth is often considered a paradigmatic example  
365 of oncogene-induced senescence (OIS), but here we question two of the major tenets of the OIS  
366 hypothesis: that nevus melanocytes are actually senescent; and that growth arrest is a direct  
367 effect of oncogene action on the individual cell.

368 To assess whether nevi are senescent, we used single cell RNA sequencing in a mouse  
369 model of *Braf*-driven nevus formation, comparing gene expression of nevus melanocytes with that  
370 of other cell types. Across a wide variety of gene expression signatures, especially those  
371 developed to distinguish senescence from other growth-arrested cell states, we failed to find any

372 evidence in support of the OIS hypothesis. By gene expression criteria, nevus melanocytes were  
373 less senescent than many other normal skin cells, including non-nevus melanocytes (Fig. 3, S3).  
374 These results support earlier work that also questioned, based on immunohistochemical staining  
375 of human nevi for markers including lysosomal  $\beta$ -galactosidase, Ki67, p16<sup>INK4a</sup> (*CDKN2A*),  $\gamma$ -H2AX  
376 and p53, whether nevus melanocytes should be considered senescent (Tran et al., 2012). In  
377 agreement with other studies, we do find that *Cdkn2A* is highly expressed in nevus cells; it is in  
378 fact the only “classical” senescence marker that clearly distinguishes nevus melanocytes from  
379 other melanocytes (Fig. 3A). Yet, as others have shown, *Cdkn2A* is neither necessary nor  
380 sufficient for oncogene-mediated melanocyte growth arrest (Haferkamp et al., 2009; Zeng et al.,  
381 2018). Thus, to the extent that nevus melanocytes do execute even part of a common senescence  
382 program, there is little to support the view that this why they stop proliferating.

383 As for the question of exactly how *Braf*-induced nevus growth arrest occurs, Figure 6 presents  
384 a continuum of models: In model A, oncogene action elicits a cell-autonomous stress response  
385 which, after some time lag, triggers senescence that shuts proliferation down. This is the form in  
386 which the OIS hypothesis is most frequently presented.

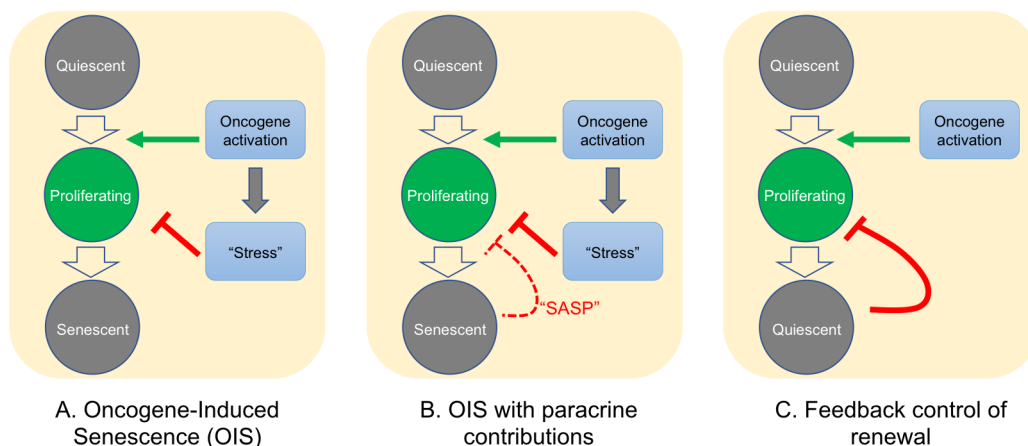

**Figure 6. Possible mechanisms of growth arrest.** Three different models of nevus growth arrest are presented, varying from classical OIS (A) to feedback control of proliferative cell renewal (C). The model in the middle panel (B) illustrates a hypothetical hybrid situation, in which paracrine effects of senescence-associated secreted proteins (SASP) act as inhibitors of melanocyte self-renewal. Although model B can mimic some of the dynamic behaviors of model C, in the absence of convincing evidence that nevus melanocytes actually are senescent, we favor model C.



387 In model C, growth-arrest is not a direct effect of oncogene action, but rather a consequence  
388 of growth itself. This type of feedback is commonly used by adult tissues to maintain constant  
389 size, and also enables developing tissues to produce precise numbers of differentiated cells  
390 (Kunche et al., 2016; Lander, 2011; Lander et al., 2009). Because of the collective nature of this  
391 mechanism—cells that have stopped dividing tell other cells in their vicinity to do likewise—it  
392 naturally produces semi-synchronous arrest of spatially-coherent cell clones, and the distinctive  
393 log-normal clone size distribution that comes along with that. In contrast, a purely cell-  
394 autonomous mechanism (panel A) has great difficulty producing such distributions (Fig. 4), either  
395 necessitating the operation of some kind of multi-cell-cycle clock, or requiring cells to complete a  
396 long sequence of independent probabilistic events prior to arresting (Fig. 4).

397 One can, of course, build a model in between these two extremes (model B), in which  
398 oncogenes induce growth arrest directly, but paracrine signals (i.e. SASP factors) help maintain  
399 it. If the paracrine role is important enough, this mechanism might also produce clone size  
400 distributions that are approximately log-normal, so we cannot categorically rule this model out.  
401 However, our gene expression data do not support any versions of it that have been explicitly  
402 proposed for nevi. So far, several groups (working predominantly from in vitro observations) have  
403 claimed a critical role for SASP factors in melanocyte OIS: Wajapeyee et al. (Wajapeyee et al.,  
404 2008) argued that IGFBP7 plays a necessary role in the establishment of BRAF-V600E-induced  
405 melanocyte senescence (a conclusion disputed by some (Scurr et al., 2010)); Feuerer et al.,  
406 (Feuerer et al., 2019) proposed that MIA (melanoma inhibitory activity) secreted by senescent  
407 melanocytes is required to maintain senescence; and Damsky and Bosenberg have proposed  
408 that IL1, IL6, IL8 (encoded in mouse by *Cxcl15*), and type 1 interferons produced by nevus cells  
409 play a role in their arrest (Damsky & Bosenberg, 2017).

410 Our in vivo data do not support any of these hypotheses. For example, we observed that the  
411 vast majority of *Igfbp7* transcripts are produced by fibroblasts and endothelial cells and that,  
412 among melanocytes, nevus melanocytes express lower levels of *Igfbp7* than non-nevus  
413 melanocytes. We did not detect any *Mia* transcripts in nevus melanocytes, although it was  
414 expressed at detectable levels in non-nevus melanocytes and various other skin cells. Likewise,  
415 of *Il1* family members, only *Il1a* transcripts were detected in nevus melanocytes and they were at  
416 levels lower than in many other skin cell types. *Il6* was also only weakly expressed in nevus  
417 melanocytes, especially when compared with other cells. Transcripts for type 1 interferons were  
418 not detected in any melanocytic cells, and *Cxcl15* transcripts were not detected in any skin cells  
419 at all.

420 Of course, the accuracy of single cell RNA sequencing can be limited for weakly expressed  
421 genes, so we cannot completely eliminate the possibility that these factors play some role in nevus  
422 growth arrest. But given these results, and the evidence that nevus melanocytes are not  
423 senescent, we strongly favor the renewal-feedback model (model C). Adopting this model also  
424 makes it easier to accommodate long-standing evidence that nevus growth arrest is not  
425 permanent (Shain & Bastian, 2016). For example, it is known that nevi may exhibit a low level of  
426 mitoses (Glatz et al., 2010); that they can grow in response to stimuli such as UV light (Rudolph  
427 et al., 1998) or immunosuppression (Shain & Bastian, 2016) and, perhaps most tellingly, they can  
428 re-grow after incomplete surgical resection—stopping again when they reach a typical nevus size  
429 (Vilain et al., 2016). The latter result is inherently problematic for any non-feedback model, but is  
430 precisely what renewal feedback predicts (Lander, 2011; Lander et al., 2009).

431 Because feedback control of renewal implements a generic strategy (integral negative  
432 feedback (Lander, 2011)), it places no constraints on the molecular details of feedback, short of  
433 the fact that whatever is mediating it needs to rise with the number of cells already arrested. One  
434 possibility is that nevi are responding to some of the same signals that are used in melanocyte  
435 homeostasis. For instance, during anagen phase of the hair cycle, melanocyte stem cells produce  
436 progeny that migrate out of the hair follicle bulge as they differentiate, leaving functional stem  
437 cells behind for future cycles. A variety of experimental and pathological circumstances that allow  
438 small numbers of melanocytes to differentiate within the bulge cause differentiation and loss of  
439 the entire stem cell pool (with concomitant hair graying (Nishimura et al., 2005)). This sort of  
440 behavior—where differentiated cells drive the differentiation of their progenitors—is exactly the  
441 sort of behavior that drives feedback models of renewal (Buzi et al., 2015; Lander, 2011; Lander  
442 et al., 2009).

443 Nevi are but one of many types of benign, clonal, proliferative lesions that arise due to the  
444 activation of oncogenes, but rarely if ever progress to malignancy (Adashek et al., 2020).  
445 Notwithstanding the disruptive influence that oncogenes can have on cell physiology, the  
446 existence of such lesions suggest that homeostatic mechanisms persist and function at many  
447 stages along the road to cancer. New avenues for cancer prevention and treatment are likely to  
448 follow from the detailed elucidation of such mechanisms.

449

## 450 **Experimental Design**

### 451 **Mouse treatment for nevus development**

452 *Braf*<sup>V600E</sup>, *Tyr:CreER* (C56BL/6) mice were genotyped by PCR as previously described  
453 (Bosenberg et al., 2006; Dankort et al., 2007). The primers used in this study are: *Braf* forward

454 5'-TGAGTATTTTTGTGGCAACTGC -3', Braf reverse 5'-CTCTGCTGGGAAAGCGCC -3', Cre  
455 forward 5'- GGTGTCCAATTTACTGACCGTACA-3' and Cre reverse 5'-  
456 CGGATCCGCCGCATAACCAGTG -3'. Topical administration of 4-hydroxytamoxifen (4-OHT;  
457 25mg/mL or 75mg/mL in DMSO; 98% Z-isomer, Sigma-Aldrich) was administered to pups on their  
458 back and/or paws at ages P2, P3, and P4. Images of nevi on back and paw skin were taken with  
459 a digital camera at the indicated ages. Nevi from the underside of the skin were imaged using a  
460 dissection microscope. All mouse procedures were approved by UCI's IACUC.

461

### 462 **Live imaging of the skin by multi-photon microscopy**

463 Mice were sedated, shaved, and depilated with wax strips at the indicated ages (during a  
464 telogen phase) and the dorsal skin was imaged to capture the intrinsic fluorescent signal from  
465 keratin, melanin, as well as the second-harmonic-generation signal from collagen, using the LSM  
466 510 NLO Zeiss system. Excitation was achieved with a femtosecond Titanium: Sapphire  
467 (Chameleon-Ultra, Coherent) laser at 900 nm. Emission was detected at 390-465 nm for second  
468 harmonic generation (blue) and 500-550 nm (green) and 565-650 (red) for fluorescence.

469

### 470 ***In vivo* labeling with BrdU**

471 BrdU was prepared in sterile PBS at 10mg/mL and injected intraperitoneally into mice that  
472 were 20 days old at 100mg/kg of body weight. 24 hours later the mouse was shaved, depilated  
473 with wax strips and the skin was removed and fixed in 10% formalin for 16 hours.

474

### 475 **Immunofluorescence**

476 Formalin fixed paraffin embedded skins were sectioned 8µm thick, deparaffinized with Xylene,  
477 and dehydrated in a series of increasing concentration of ethanol washes. Antigen retrieval was  
478 performed with 10mM citric acid buffer at pH 6.0 for 10 min in a steamer. Samples were washed  
479 with PBS, incubated with TrueBlack for 30 seconds to reduce autofluorescence, and washed  
480 again with PBS. All antibodies were diluted at a 1:500 and incubated overnight at 4°C. Samples  
481 were washed and incubated with the appropriate secondary antibody. Melanocytes were  
482 identified with a Pmel antibody (EP4863(2); ab137078, Abcam). Cells that incorporated BrdU  
483 were visualized with a BrdU antibody (ab6326, Abcam).

484

### 485 **Cell Isolation for Single Cell RNA Sequencing**

486 *Braf*<sup>WT</sup>, *Tyr::CreER* or *Braf*<sup>V600E</sup>, *Tyr::CreER* mice were euthanized at either P30 (n = 2 of each  
487 genotype) or P50 (n = 3 of each genotype), shaved, and depilated. A 2x3 cm section of the dorsal

488 skin was removed, and the fat scraped off from the underside. The piece was then diced into  
489 smaller pieces and suspended in dissociation buffer (RPMI, liberase 0.25mg/mL, Hepes 23.2 mM,  
490 Sodium Pyruvate 2.32mM, Collagenase:Dispase 1mg/mL) for 50 minutes at 37°C with gentle  
491 agitation. After incubation, DNaseI (232U) was added for 10 minutes and then inactivated with  
492 fetal bovine serum and EDTA (1mM). The tissue suspension was further dissociated  
493 mechanically with the GentleMACS using the setting m\_imptumor\_04.01, which runs for 37  
494 seconds at various speeds. Single cell suspensions were filtered twice through a 70µm strainer  
495 and dead cells removed by centrifugation at 300 x g for 15 min. The live cells were washed with  
496 0.04% UltraPure BSA:PBS buffer, gently re-suspended in the same buffer, and counted using  
497 trypan blue.

498

### 499 **Library Preparation for Single Cell RNA Sequencing and Analysis**

500 Libraries were prepared using the Chromium Single Cell 3' v2 protocol (10X Genomics).  
501 Briefly, individual cells and gel beads were encapsulated in oil droplets where cells were lysed  
502 and mRNA was reverse transcribed to 10X barcoded cDNA. Adapters were ligated to the cDNA  
503 followed by the addition of the sample index. Prepared libraries were sequenced using paired  
504 end 100 cycles chemistry for the Illumina HiSeq 4000. FASTQ files were generated from  
505 Illumina's binary base call raw output with Cell Ranger's (v2.1.0) `cellranger mkfastq` command  
506 and the count matrix for each sample was produced with `cellranger count`. All ten samples (4  
507 samples from P30 [two control (wild type) and two mutant] and 6 samples from P50 [three control  
508 and three mutant]) were aggregated together with the `cellranger aggr` command to produce one  
509 count matrix that includes all samples. Data analysis was performed with Scanpy [v1.3.6] (Wolf  
510 et al., 2018). Cells with fewer than 200 detected genes, and genes detected in less than three  
511 cells, were discarded. We calculated the percent mitochondrial gene expression and kept cells  
512 with less than 13% mitochondrial gene expression, and cells with fewer than 4000 genes/cell  
513 (35,141 cells). Each cell was normalized to total counts over all genes. In the final preprocessing  
514 step, we regressed out cell-cell variation driven by mitochondrial gene expression and the number  
515 of detected UMI. To identify clusters, we first performed principal component analysis on log-  
516 transformed data, using highly variable genes, Louvain clustering (Levine et al., 2015), and  
517 visualization with t-distributed stochastic neighbor embedding (tSNE).

518

### 519 **Quantification of nevus and nest size and cell content**

520 To quantify the sizes of nevi in mice, dorsal skin was excised and the underside visualized  
521 using a dissecting microscope. Nevi were traced, and area calculated using ImageJ. Nest sizes

522 were quantified in live mice by MPM. Sizes of human nests were measured from histological  
523 samples (n=5) obtained from the UCI Department of Dermatology. Samples were stained with  
524 hematoxylin and eosin and imaged with a microscope. A dermatologist manually identified the  
525 nests on each slide, and nest area was quantified using ImageJ. Human studies were performed  
526 under IRB protocol HS# 2019-5054.

527 Estimates of cell numbers for mouse nevi were obtained in two different ways: First, we used  
528 estimates from (Chai et al., 2014) for melanocytic nuclei per square area of mouse nevus, together  
529 with our observed median nevus radius of 76.8  $\mu\text{m}$ ; this approach led to an estimate of 897  
530 cells/nevus. As the data of (Chai et al., 2014) come from a different genetic model, we also  
531 estimated cell number as follows: Using 8  $\mu\text{m}$  sections of back skin from Albino Braf<sup>V600E</sup> mice,  
532 we used fluorescence microscopy to measure the sizes of 194 Pmel-stained melanocytes within  
533 the nests of nevi, obtaining an average cell diameter of 5.68  $\mu\text{m}$ , and counted approximately 14.4  
534 cells per  $10^4 \mu\text{m}^3$  of nest. In pigmented animals, we measured by MPM an average nest cross  
535 sectional area of 1385  $\mu\text{m}^2$ , an average nest volume of 38792  $\mu\text{m}^3$ , and an average number of  
536 nests per nevi of approximately 12, yielding an estimate of 672 cells/nevus. Given uncertainties  
537 in these measures, analyses in the manuscript take into account the possibility of an average that  
538 falls anywhere between 100 and 1000 cells.

539

## 540 **Simulations and Agent-Based Modeling**

541 Stochastic, non-spatial simulations of renewal control were obtained by Monte Carlo  
542 simulation, in which cells duplicated every cell cycle, and then chose randomly whether to  
543 differentiate or continue dividing according to a probability modified by feedback from non-dividing  
544 cells. A Hill function, with Hill coefficient =1, was used to represent the feedback.

545 To model feedback in a spatial context, we used CompuCell3D, an open-source platform for  
546 Cellular Potts modeling (Swat et al., 2012). In CPM, every generalized object or “cell” is  
547 associated with a list of attributes such as cell type, surface area, volume, etc. These enter into  
548 the calculation of an effective energy, which can be summarized as the sum of the contact energy  
549 between neighboring cells and the effective energy due to volume constraints.

550 Simulations were initialized by seeding a single cell, with a size of 25 pixel<sup>2</sup>, in the center of a  
551 300 X 300 pixel lattice, which grew and divided according to rules and parameters summarized  
552 in Data S2. To add variability to cell growth, cells randomly chose one of three different growth  
553 rates after every cell division. To add variability to cell division times, cells randomly chose a target  
554 area, between 72 and 80 pixel<sup>2</sup>, at which to divide. Growth rates were chosen to be sufficiently  
555 slow that the mean time between cell divisions came out to approximately 382 time steps. At



556 division, each cell was divided in half by a randomly-oriented division plane.

557 Upon division, a cell either remained dividing or became permanently arrested. All cells had  
558 a minimum 1% probability of arrest per cell division. Once an arrested cell was generated, it  
559 began continuous secretion of a signaling molecule that diffuses and promotes the transition from  
560 dividing to non-dividing (Kunche et al., 2016). Diffusion and decay of the feedback factor was  
561 modeled deterministically, with parameters chosen to produce a steady state decay length of 15  
562 pixels. The concentration of this factor at the center of mass of each cell then augmented the  
563 arrest probability of that cell by an amount determined by a Hill function (see Data S2).

564

### 565 **Statistical Analysis**

566 Statistical analyses for single cell RNA sequencing were performed using Scanpy. Other  
567 statistical testing was done using *Mathematica*. For the spatial analysis in Figure 5E-F, nest areas  
568 in each field were randomly swapped, with positions held constant, 5000 times, and the  
569 distributions of neighboring nest locations and sizes re-calculated each time. This allowed us to  
570 generate an envelope enclosing the 5<sup>th</sup> and 95<sup>th</sup> percentiles for the permuted data, at each target  
571 nest size, and compare the observed data with the bounds of that envelope.

572

### 573 **References**

- 574 Acosta, J. C., Banito, A., Wuestefeld, T., Georgilis, A., Janich, P., Morton, J. P., Athineos, D.,  
575 Kang, T. W., Lasitschka, F., Andrulis, M., Pascual, G., Morris, K. J., Khan, S., Jin, H.,  
576 Dharmalingam, G., Snijders, A. P., Carroll, T., Capper, D., Pritchard, C., Inman, G. J.,  
577 Longerich, T., Sansom, O. J., Benitah, S. A., Zender, L., & Gil, J. (2013). A complex  
578 secretory program orchestrated by the inflammasome controls paracrine senescence.  
579 *Nat Cell Biol*, 15(8), 978-990. <https://doi.org/10.1038/ncb2784>  
580 Adashek, J. J., Kato, S., Lippman, S. M., & Kurzrock, R. (2020). The paradox of cancer genes in  
581 non-malignant conditions: implications for precision medicine. *Genome Med*, 12(1), 16.  
582 <https://doi.org/10.1186/s13073-020-0714-y>  
583 Athreya, K. B., & Ney, P. E. (1972). *Branching Processes* (2nd ed.). Dover.  
584 Attisano, L., & Wrana, J. L. (1996). Signal transduction by members of the transforming growth  
585 factor-beta superfamily. *Cytokine Growth Factor Rev*, 7(4), 327-339.  
586 [https://doi.org/10.1016/s1359-6101\(96\)00042-1](https://doi.org/10.1016/s1359-6101(96)00042-1)  
587 Beausejour, C. M., Krtolica, A., Galimi, F., Narita, M., Lowe, S. W., Yaswen, P., & Campisi, J.  
588 (2003). Reversal of human cellular senescence: roles of the p53 and p16 pathways.  
589 *EMBO J*, 22(16), 4212-4222. <https://doi.org/10.1093/emboj/cdg417>  
590 Bennett, D. C. (2003). Human melanocyte senescence and melanoma susceptibility genes.  
591 *Oncogene*, 22(20), 3063-3069. <https://doi.org/10.1038/sj.onc.1206446>  
592 Bosenberg, M., Muthusamy, V., Curley, D. P., Wang, Z., Hobbs, C., Nelson, B., Nogueira, C.,  
593 Horner, J. W., 2nd, Depinho, R., & Chin, L. (2006). Characterization of melanocyte-  
594 specific inducible Cre recombinase transgenic mice. *Genesis*, 44(5), 262-267.  
595 <https://doi.org/10.1002/dvg.20205>

- 596 Buzi, G., Lander, A. D., & Khammash, M. (2015). Cell lineage branching as a strategy for  
597 proliferative control. *BMC Biol*, 13, 13. <https://doi.org/10.1186/s12915-015-0122-8>
- 598 Campisi, J., & d'Adda di Fagagna, F. (2007). Cellular senescence: when bad things happen to  
599 good cells. *Nat Rev Mol Cell Biol*, 8(9), 729-740. <https://doi.org/10.1038/nrm2233>
- 600 Chai, E., Ferguson, B., Prow, T., Soyer, P., & Walker, G. (2014). Three-dimensional modelling  
601 for estimation of nevus count and probability of nevus-melanoma progression in a  
602 murine model. *Pigment Cell Melanoma Res*, 27(2), 317-319.  
603 <https://doi.org/10.1111/pcmr.12195>
- 604 Chatsirisupachai, K., Palmer, D., Ferreira, S., & de Magalhaes, J. P. (2019). A human tissue-  
605 specific transcriptomic analysis reveals a complex relationship between aging, cancer,  
606 and cellular senescence. *Aging Cell*, 18(6), e13041. <https://doi.org/10.1111/acer.13041>
- 607 Chen, C. C., Wang, L., Plikus, M. V., Jiang, T. X., Murray, P. J., Ramos, R., Guerrero-Juarez, C.  
608 F., Hughes, M. W., Lee, O. K., Shi, S., Widelitz, R. B., Lander, A. D., & Chuong, C. M.  
609 (2015). Organ-level quorum sensing directs regeneration in hair stem cell populations.  
610 *Cell*, 161(2), 277-290. <https://doi.org/10.1016/j.cell.2015.02.016>
- 611 Collado, M., & Serrano, M. (2006). The power and the promise of oncogene-induced  
612 senescence markers. *Nat Rev Cancer*, 6(6), 472-476. <https://doi.org/10.1038/nrc1884>
- 613 Damsky, W. E., & Bosenberg, M. (2017). Melanocytic nevi and melanoma: unraveling a  
614 complex relationship. *Oncogene*, 36(42), 5771-5792.  
615 <https://doi.org/10.1038/onc.2017.189>
- 616 Damsky, W. E., Micevic, G., Meeth, K., Muthusamy, V., Curley, D. P., Santhanakrishnan, M.,  
617 Erdelyi, I., Platt, J. T., Huang, L., Theodosakis, N., Zaidi, M. R., Tighe, S., Davies, M. A.,  
618 Dankort, D., McMahon, M., Merlino, G., Bardeesy, N., & Bosenberg, M. (2015).  
619 mTORC1 activation blocks BrafV600E-induced growth arrest but is insufficient for  
620 melanoma formation. *Cancer Cell*, 27(1), 41-56.  
621 <https://doi.org/10.1016/j.ccell.2014.11.014>
- 622 Dankort, D., Curley, D. P., Carlidge, R. A., Nelson, B., Karnezis, A. N., Damsky, W. E., Jr., You,  
623 M. J., DePinho, R. A., McMahon, M., & Bosenberg, M. (2009). Braf(V600E) cooperates  
624 with Pten loss to induce metastatic melanoma. *Nat Genet*, 41(5), 544-552.  
625 <https://doi.org/10.1038/ng.356>
- 626 Dankort, D., Filenova, E., Collado, M., Serrano, M., Jones, K., & McMahon, M. (2007). A new  
627 mouse model to explore the initiation, progression, and therapy of BRAFV600E-induced  
628 lung tumors. *Genes Dev*, 21(4), 379-384. <https://doi.org/10.1101/gad.1516407>
- 629 Davies, H., Bignell, G. R., Cox, C., Stephens, P., Edkins, S., Clegg, S., Teague, J., Woffendin,  
630 H., Garnett, M. J., Bottomley, W., Davis, N., Dicks, E., Ewing, R., Floyd, Y., Gray, K.,  
631 Hall, S., Hawes, R., Hughes, J., Kosmidou, V., Menzies, A., Mould, C., Parker, A.,  
632 Stevens, C., Watt, S., Hooper, S., Wilson, R., Jayatilake, H., Gusterson, B. A., Cooper,  
633 C., Shipley, J., Hargrave, D., Pritchard-Jones, K., Maitland, N., Chenevix-Trench, G.,  
634 Riggins, G. J., Bigner, D. D., Palmieri, G., Cossu, A., Flanagan, A., Nicholson, A., Ho, J.  
635 W., Leung, S. Y., Yuen, S. T., Weber, B. L., Seigler, H. F., Darrow, T. L., Paterson, H.,  
636 Marais, R., Marshall, C. J., Wooster, R., Stratton, M. R., & Futreal, P. A. (2002).  
637 Mutations of the BRAF gene in human cancer. *Nature*, 417(6892), 949-954.  
638 <https://doi.org/10.1038/nature00766>
- 639 Dhomen, N., Reis-Filho, J. S., da Rocha Dias, S., Hayward, R., Savage, K., Delmas, V., Larue,  
640 L., Pritchard, C., & Marais, R. (2009). Oncogenic Braf induces melanocyte senescence  
641 and melanoma in mice. *Cancer Cell*, 15(4), 294-303.  
642 <https://doi.org/10.1016/j.ccr.2009.02.022>
- 643 Elzi, D. J., Song, M., Hakala, K., Weintraub, S. T., & Shiio, Y. (2012). Wnt antagonist SFRP1  
644 functions as a secreted mediator of senescence. *Mol Cell Biol*, 32(21), 4388-4399.  
645 <https://doi.org/10.1128/MCB.06023-11>

- 646 Feuerer, L., Lamm, S., Henz, I., Kappelmann-Fenzl, M., Haferkamp, S., Meierjohann, S.,  
647 Hellerbrand, C., Kuphal, S., & Bosserhoff, A. K. (2019). Role of melanoma inhibitory  
648 activity in melanocyte senescence. *Pigment Cell & Melanoma Research*, 32(6), 777-791.  
649 <https://doi.org/10.1111/pcmr.12801>
- 650 Glatz, K., Hartmann, C., Antic, M., & Kutzner, H. (2010). Frequent mitotic activity in banal  
651 melanocytic nevi uncovered by immunohistochemical analysis. *Am J Dermatopathol*,  
652 32(7), 643-649. <https://doi.org/10.1097/DAD.0b013e3181d7ce6f>
- 653 Gokoffski, K. K., Wu, H. H., Beites, C. L., Kim, J., Kim, E. J., Matzuk, M. M., Johnson, J. E.,  
654 Lander, A. D., & Calof, A. L. (2011). Activin and GDF11 collaborate in feedback control  
655 of neuroepithelial stem cell proliferation and fate. *Development*, 138(19), 4131-4142.  
656 <https://doi.org/10.1242/dev.065870>
- 657 Gorgoulis, V., Adams, P. D., Alimonti, A., Bennett, D. C., Bischof, O., Bishop, C., Campisi, J.,  
658 Collado, M., Evangelou, K., Ferbeyre, G., Gil, J., Hara, E., Krizhanovskiy, V., Jurk, D.,  
659 Maier, A. B., Narita, M., Niedernhofer, L., Passos, J. F., Robbins, P. D., Schmitt, C. A.,  
660 Sedivy, J., Vougas, K., von Zglinicki, T., Zhou, D., Serrano, M., & Demaria, M. (2019).  
661 Cellular Senescence: Defining a Path Forward. *Cell*, 179(4), 813-827.  
662 <https://doi.org/10.1016/j.cell.2019.10.005>
- 663 Haferkamp, S., Scurr, L. L., Becker, T. M., Frausto, M., Kefford, R. F., & Rizos, H. (2009).  
664 Oncogene-induced senescence does not require the p16(INK4a) or p14ARF melanoma  
665 tumor suppressors. *J Invest Dermatol*, 129(8), 1983-1991.  
666 <https://doi.org/10.1038/jid.2009.5>
- 667 Hernandez-Segura, A., de Jong, T. V., Melov, S., Guryev, V., Campisi, J., & Demaria, M.  
668 (2017). Unmasking Transcriptional Heterogeneity in Senescent Cells. *Curr Biol*, 27(17),  
669 2652-2660 e2654. <https://doi.org/10.1016/j.cub.2017.07.033>
- 670 Huang, J. M., Chikeka, I., & Hornyak, T. J. (2017). Melanocytic Nevi and the Genetic and  
671 Epigenetic Control of Oncogene-Induced Senescence. *Dermatol Clin*, 35(1), 85-93.  
672 <https://doi.org/10.1016/j.det.2016.08.001>
- 673 Ito, Y., Hoare, M., & Narita, M. (2017). Spatial and Temporal Control of Senescence. *Trends*  
674 *Cell Biol*, 27(11), 820-832. <https://doi.org/10.1016/j.tcb.2017.07.004>
- 675 Joost, S., Annusver, K., Jacob, T., Sun, X., Dalessandri, T., Sivan, U., Sequeira, I., Sandberg,  
676 R., & Kasper, M. (2020). The Molecular Anatomy of Mouse Skin during Hair Growth and  
677 Rest. *Cell Stem Cell*, 26(3), 441-457 e447. <https://doi.org/10.1016/j.stem.2020.01.012>
- 678 Joshi, S. S., Tandukar, B., Pan, L., Huang, J. M., Livak, F., Smith, B. J., Hodges, T., Mahurkar,  
679 A. A., & Hornyak, T. J. (2019). CD34 defines melanocyte stem cell subpopulations with  
680 distinct regenerative properties. *PLoS Genet*, 15(4), e1008034.  
681 <https://doi.org/10.1371/journal.pgen.1008034>
- 682 Kaplon, J., Homig-Holzel, C., Gao, L., Meissl, K., Verdegaal, E. M., van der Burg, S. H., van  
683 Doorn, R., & Peeper, D. S. (2014). Near-genomewide RNAi screening for regulators of  
684 BRAF(V600E) -induced senescence identifies RASEF, a gene epigenetically silenced in  
685 melanoma. *Pigment Cell Melanoma Res*, 27(4), 640-652.  
686 <https://doi.org/10.1111/pcmr.12248>
- 687 Kaufman, C. K., Mosimann, C., Fan, Z. P., Yang, S., Thomas, A. J., Ablain, J., Tan, J. L.,  
688 Fogley, R. D., van Rooijen, E., Hagedorn, E. J., Ciarlo, C., White, R. M., Matos, D. A.,  
689 Puller, A. C., Santoriello, C., Liao, E. C., Young, R. A., & Zon, L. I. (2016). A zebrafish  
690 melanoma model reveals emergence of neural crest identity during melanoma initiation.  
691 *Science*, 351(6272), aad2197. <https://doi.org/351/6272/aad2197> [pii]  
692 10.1126/science.aad2197
- 693 Kuilman, T., Michaloglou, C., Mooi, W. J., & Peeper, D. S. (2010). The essence of senescence.  
694 *Genes Dev*, 24(22), 2463-2479. <https://doi.org/10.1101/gad.1971610>
- 695 Kuilman, T., Michaloglou, C., Vredeveld, L. C., Douma, S., van Doorn, R., Desmet, C. J.,  
696 Aarden, L. A., Mooi, W. J., & Peeper, D. S. (2008). Oncogene-induced senescence

- 697 relayed by an interleukin-dependent inflammatory network. *Cell*, 133(6), 1019-1031.  
698 <https://doi.org/10.1016/j.cell.2008.03.039>
- 699 Kunche, S., Yan, H., Calof, A. L., Lowengrub, J. S., & Lander, A. D. (2016). Feedback, Lineages  
700 and Self-Organizing Morphogenesis. *PLoS Comput Biol*, 12(3), e1004814.  
701 <https://doi.org/10.1371/journal.pcbi.1004814>
- 702 Lander, A. D. (2011). Pattern, growth, and control. *Cell*, 144(6), 955-969.  
703 <https://doi.org/10.1016/j.cell.2011.03.009>
- 704 Lander, A. D., Gokoffski, K. K., Wan, F. Y., Nie, Q., & Calof, A. L. (2009). Cell lineages and the  
705 logic of proliferative control. *PLoS Biol*, 7(1), e15.  
706 <https://doi.org/10.1371/journal.pbio.1000015>
- 707 Lee, S. J., Reed, L. A., Davies, M. V., Girgenrath, S., Goad, M. E., Tomkinson, K. N., Wright, J.  
708 F., Barker, C., Ehrmantraut, G., Holmstrom, J., Trowell, B., Gertz, B., Jiang, M. S.,  
709 Sebald, S. M., Matzuk, M., Li, E., Liang, L. F., Quattlebaum, E., Stotish, R. L., &  
710 Wolfman, N. M. (2005). Regulation of muscle growth by multiple ligands signaling  
711 through activin type II receptors. *Proc Natl Acad Sci U S A*, 102(50), 18117-18122.  
712 <https://doi.org/10.1073/pnas.0505996102>
- 713 Levine, J. H., Simonds, E. F., Bendall, S. C., Davis, K. L., Amir el, A. D., Tadmor, M. D., Litvin,  
714 O., Fienberg, H. G., Jager, A., Zunder, E. R., Finck, R., Gedman, A. L., Radtke, I.,  
715 Downing, J. R., Pe'er, D., & Nolan, G. P. (2015). Data-Driven Phenotypic Dissection of  
716 AML Reveals Progenitor-like Cells that Correlate with Prognosis. *Cell*, 162(1), 184-197.  
717 <https://doi.org/10.1016/j.cell.2015.05.047>
- 718 Michaloglou, C., Vredeveld, L. C., Soengas, M. S., Denoyelle, C., Kuilman, T., van der Horst, C.  
719 M., Majoor, D. M., Shay, J. W., Mooi, W. J., & Peeper, D. S. (2005). BRAFE600-  
720 associated senescence-like cell cycle arrest of human naevi. *Nature*, 436(7051), 720-  
721 724. <https://doi.org/10.1038/nature03890>
- 722 Neufeld, G., Mumblat, Y., Smolkin, T., Toledano, S., Nir-Zvi, I., Ziv, K., & Kessler, O. (2016).  
723 The role of the semaphorins in cancer. *Cell Adh Migr*, 10(6), 652-674.  
724 <https://doi.org/10.1080/19336918.2016.1197478>
- 725 Nishimura, E. K., Granter, S. R., & Fisher, D. E. (2005). Mechanisms of hair graying: incomplete  
726 melanocyte stem cell maintenance in the niche. *Science*, 307(5710), 720-724.  
727 <https://doi.org/10.1126/science.1099593>
- 728 Patton, E. E., Widlund, H. R., Kutok, J. L., Kopani, K. R., Amatruda, J. F., Murphey, R. D.,  
729 Berghmans, S., Mayhall, E. A., Traver, D., Fletcher, C. D., Aster, J. C., Granter, S. R.,  
730 Look, A. T., Lee, C., Fisher, D. E., & Zon, L. I. (2005). BRAF mutations are sufficient to  
731 promote nevi formation and cooperate with p53 in the genesis of melanoma. *Curr Biol*,  
732 15(3), 249-254. <https://doi.org/10.1016/j.cub.2005.01.031>
- 733 Pollock, P. M., Harper, U. L., Hansen, K. S., Yudt, L. M., Stark, M., Robbins, C. M., Moses, T.  
734 Y., Hostetter, G., Wagner, U., Kakareka, J., Salem, G., Pohida, T., Heenan, P., Duray,  
735 P., Kallioniemi, O., Hayward, N. K., Trent, J. M., & Meltzer, P. S. (2003). High frequency  
736 of BRAF mutations in nevi. *Nat Genet*, 33(1), 19-20. <https://doi.org/10.1038/ng1054>
- 737 Rudolph, P., Tronnier, M., Menzel, R., Moller, M., & Parwaresch, R. (1998). Enhanced  
738 expression of Ki-67, topoisomerase IIalpha, PCNA, p53 and p21WAF1/Cip1 reflecting  
739 proliferation and repair activity in UV-irradiated melanocytic nevi. *Hum Pathol*, 29(12),  
740 1480-1487. [https://doi.org/10.1016/s0046-8177\(98\)90019-3](https://doi.org/10.1016/s0046-8177(98)90019-3)
- 741 Saager, R. B., Balu, M., Crosignani, V., Sharif, A., Durkin, A. J., Kelly, K. M., & Tromberg, B. J.  
742 (2015). In vivo measurements of cutaneous melanin across spatial scales: using  
743 multiphoton microscopy and spatial frequency domain spectroscopy. *J Biomed Opt*,  
744 20(6), 066005. <https://doi.org/10.1117/1.JBO.20.6.066005>
- 745 Santulli, G. (2014). Angiopoietin-like proteins: a comprehensive look. *Front Endocrinol*  
746 (*Lausanne*), 5, 4. <https://doi.org/10.3389/fendo.2014.00004>



- 747 Scurr, L. L., Pupo, G. M., Becker, T. M., Lai, K., Schrama, D., Haferkamp, S., Irvine, M.,  
748 Scolyer, R. A., Mann, G. J., Becker, J. C., Kefford, R. F., & Rizos, H. (2010). IGFBP7 is  
749 not required for B-RAF-induced melanocyte senescence. *Cell*, *141*(4), 717-727.  
750 <https://doi.org/10.1016/j.cell.2010.04.021>
- 751 Serrano, M., Lin, A. W., McCurrach, M. E., Beach, D., & Lowe, S. W. (1997). Oncogenic ras  
752 provokes premature cell senescence associated with accumulation of p53 and  
753 p16INK4a. *Cell*, *88*(5), 593-602. <http://www.ncbi.nlm.nih.gov/pubmed/9054499>
- 754 Shain, A. H., & Bastian, B. C. (2016). From melanocytes to melanomas. *Nat Rev Cancer*, *16*(6),  
755 345-358. <https://doi.org/10.1038/nrc.2016.37>
- 756 Swat, M. H., Thomas, G. L., Belmonte, J. M., Shirinifard, A., Hmeljak, D., & Glazier, J. A. (2012).  
757 Multi-scale modeling of tissues using CompuCell3D. *Methods Cell Biol*, *110*, 325-366.  
758 <https://doi.org/10.1016/B978-0-12-388403-9.00013-8>
- 759 Tadros, W., & Lipshitz, H. D. (2009). The maternal-to-zygotic transition: a play in two acts.  
760 *Development*, *136*(18), 3033-3042. <https://doi.org/10.1242/dev.033183>
- 761 Tran, S. L., Haferkamp, S., Scurr, L. L., Gowrishankar, K., Becker, T. M., Desilva, C.,  
762 Thompson, J. F., Scolyer, R. A., Kefford, R. F., & Rizos, H. (2012). Absence of  
763 distinguishing senescence traits in human melanocytic nevi. *J Invest Dermatol*, *132*(9),  
764 2226-2234. <https://doi.org/10.1038/jid.2012.126>
- 765 Venet, D., Dumont, J. E., & Detours, V. (2011). Most random gene expression signatures are  
766 significantly associated with breast cancer outcome. *PLoS Comput Biol*, *7*(10),  
767 e1002240. <https://doi.org/10.1371/journal.pcbi.1002240>
- 768 Vilain, R. E., McCarthy, S. W., & Scolyer, R. A. (2016). The regenerating naevus. *Pathology*,  
769 *48*(2), 108-112. <https://doi.org/10.1016/j.pathol.2015.12.009>
- 770 Vredeveld, L. C., Possik, P. A., Smit, M. A., Meissl, K., Michaloglou, C., Horlings, H. M.,  
771 Ajouaou, A., Kortman, P. C., Dankort, D., McMahon, M., Mooi, W. J., & Peeper, D. S.  
772 (2012). Abrogation of BRAFV600E-induced senescence by PI3K pathway activation  
773 contributes to melanomagenesis. *Genes Dev*, *26*(10), 1055-1069.  
774 <https://doi.org/10.1101/gad.187252.112>
- 775 Wajapeyee, N., Serra, R. W., Zhu, X., Mahalingam, M., & Green, M. R. (2008). Oncogenic  
776 BRAF induces senescence and apoptosis through pathways mediated by the secreted  
777 protein IGFBP7. *Cell*, *132*(3), 363-374. <https://doi.org/10.1016/j.cell.2007.12.032>
- 778 Wiley, C. D., Flynn, J. M., Morrissey, C., Lebofsky, R., Shuga, J., Dong, X., Unger, M. A., Vijg,  
779 J., Melov, S., & Campisi, J. (2017). Analysis of individual cells identifies cell-to-cell  
780 variability following induction of cellular senescence. *Aging Cell*, *16*(5), 1043-1050.  
781 <https://doi.org/10.1111/acer.12632>
- 782 Wolf, F. A., Angerer, P., & Theis, F. J. (2018). SCANPY: large-scale single-cell gene expression  
783 data analysis. *Genome Biol*, *19*(1), 15. <https://doi.org/10.1186/s13059-017-1382-0>
- 784 Yu, Y., Schleich, K., Yue, B., Ji, S., Lohneis, P., Kemper, K., Silvis, M. R., Qutob, N., van  
785 Rooijen, E., Werner-Klein, M., Li, L., Dhawan, D., Meierjohann, S., Reimann, M.,  
786 Elkahoul, A., Treitschke, S., Dorken, B., Speck, C., Mallette, F. A., Zon, L. I., Holmen,  
787 S. L., Peeper, D. S., Samuels, Y., Schmitt, C. A., & Lee, S. (2018). Targeting the  
788 Senescence-Overriding Cooperative Activity of Structurally Unrelated H3K9  
789 Demethylases in Melanoma. *Cancer Cell*, *33*(2), 322-336 e328.  
790 <https://doi.org/10.1016/j.ccell.2018.01.002>
- 791 Zeng, H., Jorapur, A., Shain, A. H., Lang, U. E., Torres, R., Zhang, Y., McNeal, A. S., Botton, T.,  
792 Lin, J., Donne, M., Bastian, I. N., Yu, R., North, J. P., Pincus, L., Ruben, B. S., Joseph,  
793 N. M., Yeh, I., Bastian, B. C., & Judson, R. L. (2018). Bi-allelic Loss of CDKN2A Initiates  
794 Melanoma Invasion via BRN2 Activation. *Cancer Cell*, *34*(1), 56-68 e59.  
795 <https://doi.org/10.1016/j.ccell.2018.05.014>
- 796 Zhang, B., Ma, S., Rachmin, I., He, M., Baral, P., Choi, S., Goncalves, W. A., Shwartz, Y., Fast,  
797 E. M., Su, Y., Zon, L. I., Regev, A., Buenrostro, J. D., Cunha, T. M., Chiu, I. M., Fisher,



798 D. E., & Hsu, Y. C. (2020). Hyperactivation of sympathetic nerves drives depletion of  
799 melanocyte stem cells. *Nature*, 577(7792), 676-681. [https://doi.org/10.1038/s41586-020-](https://doi.org/10.1038/s41586-020-1935-3)  
800 [1935-3](https://doi.org/10.1038/s41586-020-1935-3)  
801

## 802 **Acknowledgments**

803 The authors are grateful to Eric Mjolsness, Allon Klein, Randy Heiland and Paul Macklin for helpful  
804 discussions. **Funding:** This work was supported by National Institute of Health (NIH) grants  
805 U54CA217378 (ADL, AG, JL). MGC was supported by NiH-T32EB009418. RRV was supported  
806 by the UC Presidents fellowship, FORD Foundation Fellowship and NIH-T32CA00905. **Author**  
807 **Contribution:** R.R.V., A.D.L., and A.K.G. conceived and designed the experiments. Multiphoton  
808 microscopy experiments were conducted by C.-F.C., P.V., T.B.K. Nest and nevus analysis were  
809 performed by R.R.V., E.R., M.G.C., H.Y., and J.L. Single cell experiments were conducted by  
810 R.R.V. and C.-F.C. and analyzed by R.R.V. and A.D.L. Human nevi were analyzed by J.S. Growth  
811 arrest models was done by M.G.C. and A.D.L. Agent based simulations were performed by  
812 R.R.V. The work was supervised by A.D.L. and A.K.G. The manuscript was written by A.D.L.  
813 and R.R.V. **Declaration of interests:** No conflict of interest declared by any author. **Data**  
814 **Availability:** Raw sequence data are available at GEO (Accession number TBA).

815

816
